# Supplementary material for: Characterization of Macrophage and Cytokine Interactions with Biomaterials Used in Negative-Pressure Wound Therapy
Source: MDPI journal article supplement (doi:10.3390/bioengineering9010002), 2021-12-22
Supplement: s1 [file s1]

|                            | Granufoam (GF)                                                                                                                                           | Veraflo Cleanse (VC)                                 | Cotton (CT)                                        |
|----------------------------|----------------------------------------------------------------------------------------------------------------------------------------------------------|------------------------------------------------------|----------------------------------------------------|
| Appearance and composition | Black, polyurethane ether, open cell reticulated foam                                                                                                    | Gray, polyurethane ester, open cell reticulated foam | White, woven cotton gauze pads (majorly cellulose) |
| Porosity                   | 400 - 600 $\mu\text{m}$<br>Isometric pores                                                                                                               | 133 - 600 $\mu\text{m}$<br>Anisometric pores         | N/A                                                |
| Hydro-phobicity            | Relatively hydrophobic compared to VC                                                                                                                    | Relatively hydrophilic compared to GF                | Highly absorbent                                   |
| Application                | NPWT without instillation                                                                                                                                | NPWT with instillation                               | Control; wound contact layer                       |
| Polymer chemical structure | 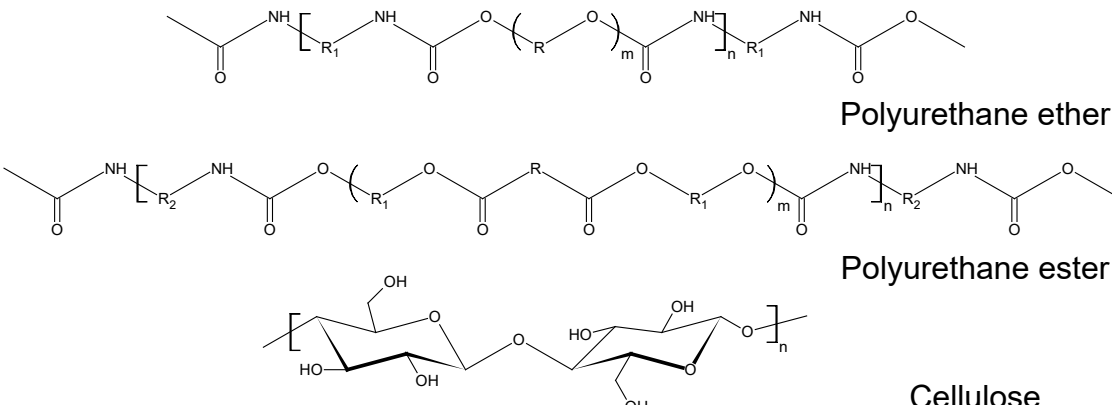 <p>Polyurethane ether</p> <p>Polyurethane ester</p> <p>Cellulose</p> |                                                      |                                                    |

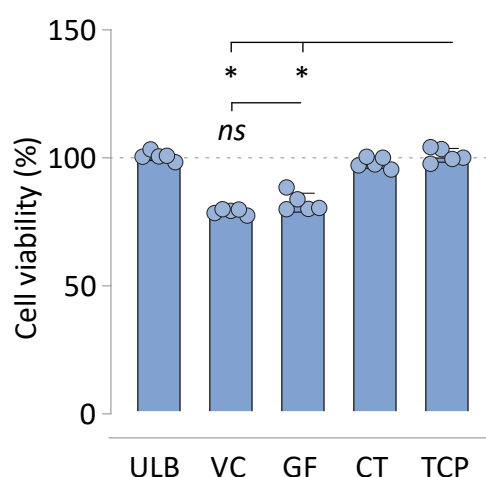

**Figure S1.** Summary of material properties used in the study (above), and the results of MTT assay used to assess the cytotoxicity of the materials (below, results of 5 replicate experiments). Abbreviations are as follows: UL – Ultralow attachment plate surface, VC – Veraflo Cleanse, GF – Granufoam, CT – Cotton gauze, TCP – Tissue culture plastic. \* indicates  $p < 0.05$  as tested using one-way ANOVA with multiple comparisons.

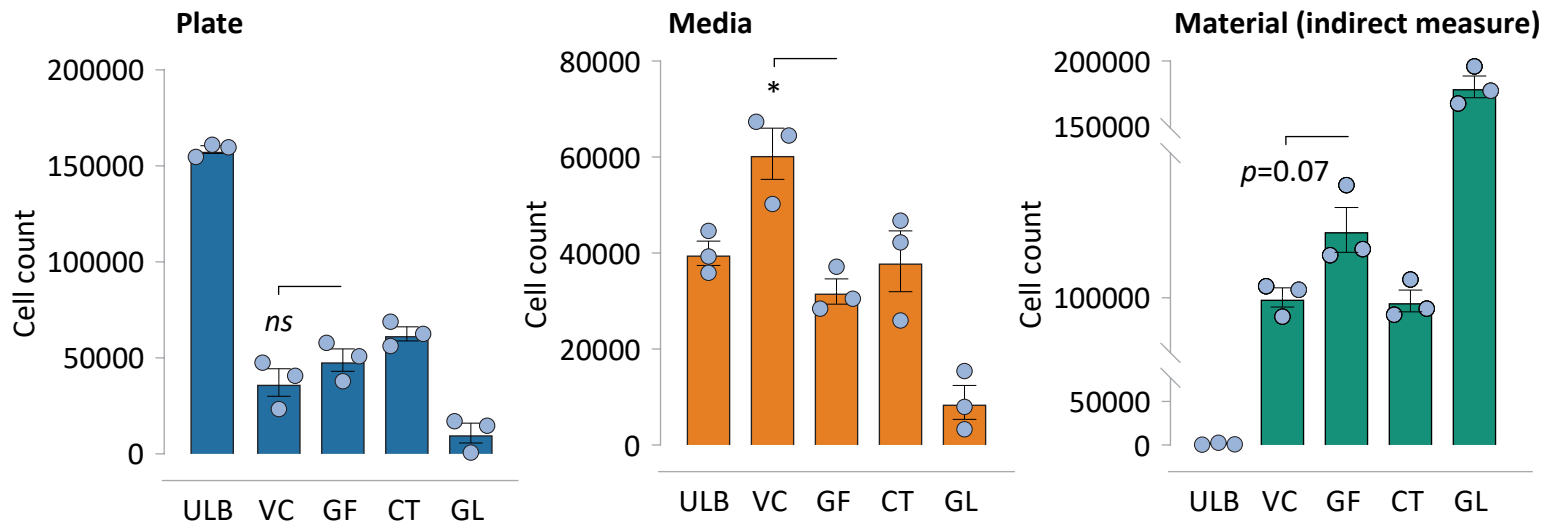

**Figure S2.** Counts of cells measured on the plate and media in the CyQUANT assay in figure 2. The media had a significantly higher number of cells when cultured on VC, in comparison with all other conditions, including GF. All bar plots are represented as mean of 3 independent experiments, with error indicating the S.E.M. Abbreviations are as follows: UL – Ultralow attachment plate surface, VC – Veraflo Cleanse, GF – Granufoam, CT – Cotton gauze, GL – Glass coverslip. \* indicates  $p < 0.05$  as tested using one-way ANOVA with multiple comparisons.

Supplemental Figure 3

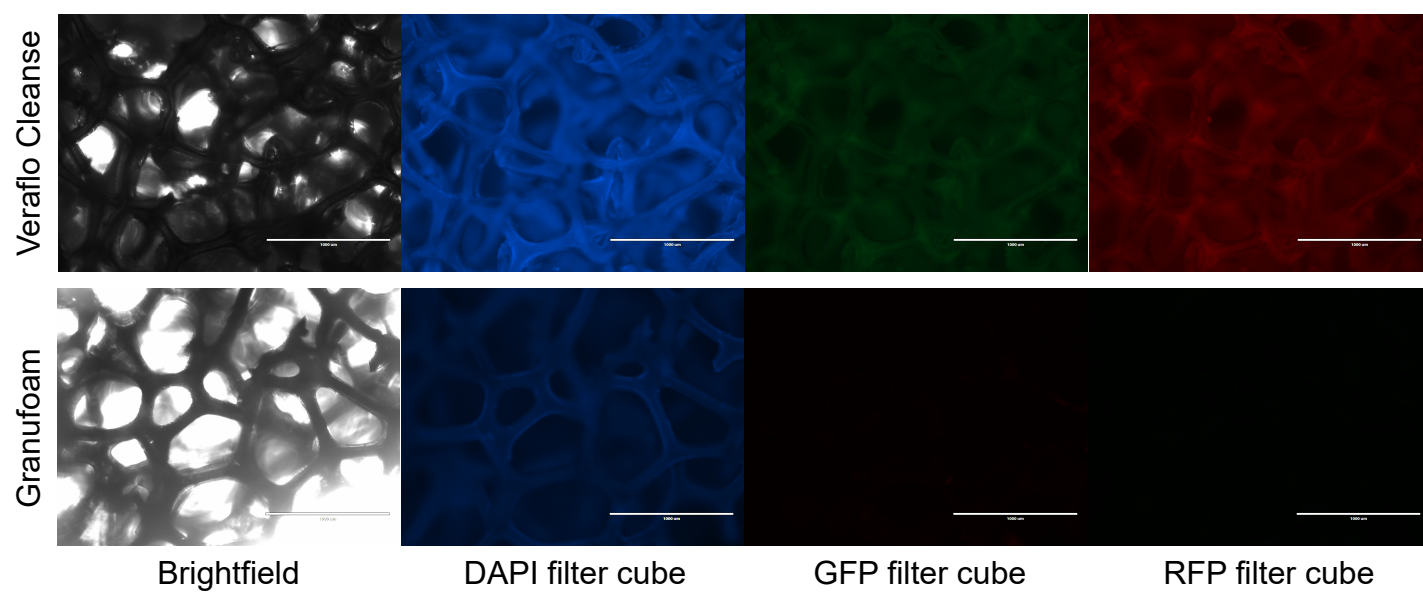

**Figure S3.** Evaluation of material autofluorescence using epifluorescence microscopy.
